# Supplementary material for: Cardiac Magnetic Resonance Feature Tracking in Aortic Stenosis: Exploration of Strain Parameters and Prognostic Value in Asymptomatic Patients with Preserved Ejection Fraction
Source: PubMed Central journal article supplement — Korean J Radiol. 2020 Feb 11;21(3):268–79. doi: 10.3348/kjr.2019.0441 (PMC7039715; doi:10.3348/kjr.2019.0441), 2020-02-11
Supplement: kjr-21-268-s002.pdf [file kjr-21-268-s002.pdf]

**Supplementary Table 1. Clinical Characteristics and Echocardiographic and CMR Parameters in Total Asymptomatic Aortic Stenosis Group with Preserved EF and Its Subgroups according to Presence or Absence of CCE**

| Parameter                                                    | Total (n = 67) | CCE+ (n = 22) | CCE- (n = 45) | P        |
|--------------------------------------------------------------|----------------|---------------|---------------|----------|
| <b>Clinical characteristics</b>                              |                |               |               |          |
| Number of men                                                | 29 (43)        | 9 (41)        | 20 (44)       | 0.788    |
| Age (years)                                                  | 68.4 ± 9.6     | 70.3 ± 7.5    | 67.5 ± 10.4   | 0.271    |
| Body surface area (m <sup>2</sup> )                          | 1.67 ± 0.15    | 1.67 ± 0.12   | 1.67 ± 0.16   | 0.919    |
| Systolic blood pressure                                      | 132 ± 16       | 139 ± 14      | 128 ± 16      | 0.100    |
| Diastolic blood pressure                                     | 72 ± 11        | 74 ± 12       | 71 ± 10       | 0.355    |
| Hypertension medication                                      | 44 (66)        | 15 (68)       | 29 (64)       | 0.766    |
| Beta-blockers                                                | 23 (34)        | 6 (27)        | 17 (38)       | 0.403    |
| Renin angiotensin system blockers                            | 33 (49)        | 10 (45)       | 23 (51)       | 0.669    |
| Calcium channel blockers                                     | 17 (25)        | 5 (23)        | 12 (27)       | 0.733    |
| Diuretics                                                    | 10 (15)        | 3 (14)        | 7 (16)        | 0.839    |
| Diabetes mellitus                                            | 15 (22)        | 9 (41)        | 6 (13)        | 0.027*   |
| Dyslipidemia                                                 | 16 (24)        | 7 (32)        | 9 (20)        | 0.294    |
| Current smoker                                               | 4 (6)          | 1 (5)         | 3 (7)         | 0.736    |
| Atrial fibrillation                                          | 7 (10)         | 2 (9)         | 5 (11)        | 0.803    |
| Serum creatinine level (mg/dL)                               | 0.88 ± 0.21    | 0.89 ± 0.21   | 0.88 ± 0.22   | 0.842    |
| Follow-up duration (months)                                  | 29.0 ± 14.2    | 32 ± 13       | 27 ± 15       | 0.149    |
| Subjects with CCE                                            | 22 (33)        | 22 (100)      | 0 (0)         |          |
| <b>Echocardiography</b>                                      |                |               |               |          |
| LVEF (%)                                                     | 63.6 ± 5.0     | 61.4 ± 6.5    | 60.2 ± 10.5   | 0.467    |
| LV end-diastolic diameter (mm)                               | 47.8 ± 4.7     | 48.8 ± 6.3    | 50.0 ± 6.2    | 0.308    |
| LV end-systolic diameter (mm)                                | 28.8 ± 3.6     | 30.3 ± 6.1    | 31.6 ± 7.7    | 0.144    |
| LV mass index (mL/m <sup>2</sup> )                           | 118 ± 33       | 107.9 ± 36.9  | 138.7 ± 37.3  | < 0.001* |
| Interventricular septal thickness (mm)                       | 11.2 ± 2.3     | 10.2 ± 1.6    | 11.9 ± 1.2    | < 0.001* |
| Posterior wall thickness (mm)                                | 10.8 ± 2.0     | 10.2 ± 1.7    | 11.5 ± 1.9    | < 0.001* |
| E velocity (m/sec)                                           | 0.69 ± 0.22    | 0.75 ± 0.31   | 0.70 ± 0.24   | 0.336    |
| Deceleration time (msec)                                     | 241 ± 76       | 222 ± 86      | 250 ± 78      | 0.074    |
| e' velocity (cm/sec)                                         | 4.64 ± 1.46    | 4.7 ± 1.4     | 4.1 ± 1.3     | 0.031*   |
| Transaortic peak velocity (m/sec)                            | 4.37 ± 0.93    | 3.7 ± 0.5     | 4.9 ± 0.7     | < 0.001* |
| Transaortic mean pressure gradient (mm Hg)                   | 45.5 ± 20.8    | 32.0 ± 9.5    | 57.7 ± 17.3   | < 0.001* |
| Aortic valve area (cm <sup>2</sup> )                         | 0.86 ± 0.23    | 1.02 ± 0.21   | 0.69 ± 0.16   | < 0.001* |
| Indexed aortic valve area (cm <sup>2</sup> /m <sup>2</sup> ) | 0.52 ± 0.15    | 0.61 ± 0.14   | 0.41 ± 0.09   | < 0.001* |
| <b>CMR</b>                                                   |                |               |               |          |
| LVEF (%)                                                     | 69.0 ± 6.7     | 65.3 ± 10.3   | 60.3 ± 15.4   | 0.034*   |
| LV end-diastolic volume index (mL/m <sup>2</sup> )           | 87.4 ± 23.9    | 85.6 ± 27.1   | 104.8 ± 35.3  | 0.001*   |
| LV end-systolic volume index (mL/m <sup>2</sup> )            | 27.9 ± 11.4    | 32.0 ± 21.6   | 45.5 ± 32.3   | 0.007*   |
| LV mass index (mL/m <sup>2</sup> )                           | 89.3 ± 32.6    | 76.2 ± 22.6   | 107.4 ± 37.2  | < 0.001* |
| Heart rate (beats per minute)                                | 64.9 ± 11.5    | 67.4 ± 11.4   | 66.6 ± 13.0   | 0.741    |
| Noncontrast T1 (msec)                                        | 1218 ± 53      | 1217 ± 62     | 1240 ± 46     | 0.019*   |
| <b>Global peak strain parameters</b>                         |                |               |               |          |
| <b>2D</b>                                                    |                |               |               |          |
| Longitudinal                                                 | -17.0 ± 3.42   | -15.6 ± 3.01  | -17.6 ± 3.62  | 0.017*   |
| Radial                                                       | 48.8 ± 9.33    | 45.2 ± 10.5   | 50.5 ± 8.74   | 0.047*   |
| Circumferential                                              | -21.1 ± 2.36   | -20.1 ± 3.29  | -21.6 ± 1.91  | 0.026*   |
| <b>3D</b>                                                    |                |               |               |          |
| Longitudinal                                                 | -17.4 ± 2.69   | -16.7 ± 3.14  | -17.8 ± 2.47  | 0.026*   |
| Radial                                                       | 51.2 ± 11.7    | 46.2 ± 13.1   | 53.6 ± 11.0   | 0.019*   |
| Circumferential                                              | -20.3 ± 2.42   | -19.2 ± 2.75  | -20.8 ± 2.26  | 0.169*   |

Continuous variables are presented as means ± standard deviations, and dichotomous variables are presented as numbers of patients, with percentages in parentheses. Each parameter was compared by using either Student's *t* test or  $\chi^2$  test, as appropriate. \**p* < 0.05. CCE = clinical cardiac event, CCE+ = group of subjects with CCEs, CCE- = group of subjects without CCEs, CMR = cardiac magnetic resonance, LV = left ventricle, EF = ejection fraction, 2D = two-dimensional, 3D = three-dimensional
